# Supplementary material for: NixP and Mn3O4 dual co-catalysts separately deposited on a g-C3N4/red phosphorus hybrid photocatalyst for an efficient hydrogen evolution
Source: Royal Society of Chemistry journal article supplement (doi:10.1039/d2nj00395c), 2022-01-01
Supplement: d2nj00395c1.pdf [file d2nj00395c1.pdf]

## Supporting Information

### **Ni<sub>x</sub>P and Mn<sub>3</sub>O<sub>4</sub> dual co-catalysts separately deposited on g-C<sub>3</sub>N<sub>4</sub>/red phosphorus hybrid photocatalyst for efficient hydrogen evolution**

*Qinyi Mao, Dandan Li, Yuming Dong\**

International Joint Research Center for Photo-responsive Molecules and Materials,  
School of Chemical and Material Engineering, Jiangnan University, Wuxi 214122, P.  
R. China

\* Corresponding author, Email: [dongym@jiangnan.edu.cn](mailto:dongym@jiangnan.edu.cn).

## Photochemical formation of CNP-Ni-Mn

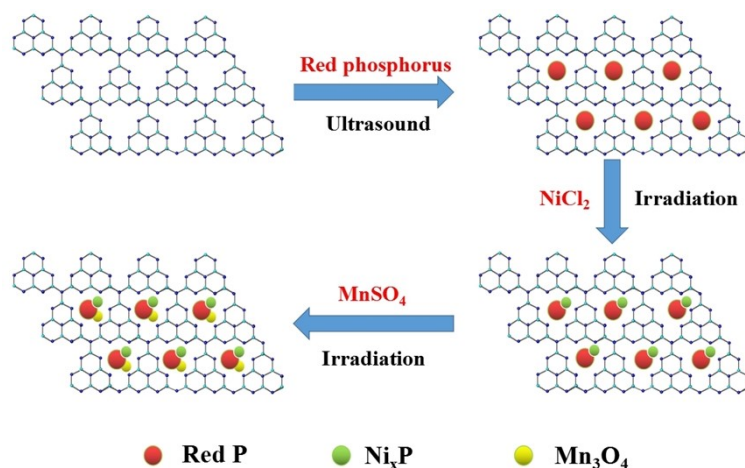

**Scheme S1.** The proposed photochemical synthesis route of CNP-Ni-Mn.

CNP-Ni-Mn is prepared by a two-step photodeposition process (Scheme S1). The first step is to form reduction co-catalyst Ni<sub>x</sub>P on the conduction band by adding NiCl<sub>2</sub>. During this process, P (0) at the conduction band is reduced to Ni<sub>x</sub>P (+δ) by photo-generated electron (eq 2), and P (0) at the valence band is oxidized to PO<sub>x</sub> (+δ) (eq 3).

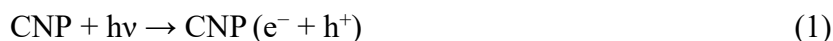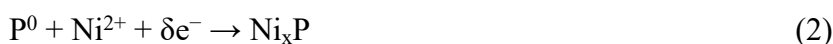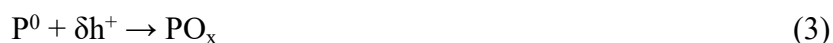

The second step is to deposit the oxidation co-catalyst Mn<sub>3</sub>O<sub>4</sub> at the valence band position. In this process, the product CNP-Ni of the first step was added as a carrier. After photo-excitation generates electrons and holes (eq. 4), hydrogen is producing at the conduction band position due to the presence of the reduction co-catalyst (eq. 5), and the generated hydrogen gas has been measured by gas chromatography. At the valence band position, Mn<sup>2+</sup> is oxidized by photo-generated holes to form oxidation co-catalyst Mn<sub>3</sub>O<sub>4</sub> (eq. 6).

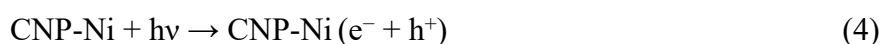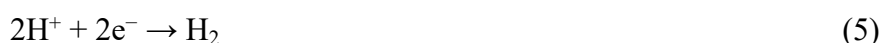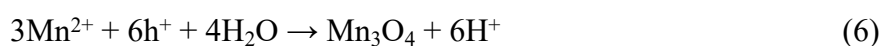

**Table S1.** Conditions of control experiments.

|   | CNP<br>/mg  | NiCl <sub>2</sub><br>(0.1M)<br>/mL | MnSO <sub>4</sub><br>(0.1M)<br>/mL | H <sub>2</sub> O<br>/mL | Irradiation<br>time<br>/min | Heating<br>time (50°C)<br>/min | Stirring<br>time<br>/min |
|---|-------------|------------------------------------|------------------------------------|-------------------------|-----------------------------|--------------------------------|--------------------------|
| A | 30          | -                                  | 1                                  | 9                       | 50                          | -                              | -                        |
| B | 30          | 1                                  | -                                  | 9                       | 50                          | -                              | -                        |
| C | 30          | 1                                  | 1                                  | 8                       | 50                          | -                              | -                        |
| D | 30          | -                                  | 1                                  | 9                       | 50                          | -                              | -                        |
|   | 30(CNP-Mn)  | 1                                  | -                                  | 9                       | 50                          | -                              | -                        |
| E | 30          | 1                                  | -                                  | 9                       | 50                          | -                              | -                        |
|   | 30(CNP-Ni)  | -                                  | 1                                  | 9                       | 50                          | -                              | -                        |
| F | 30          | 1                                  | -                                  | 9                       | -                           | 50                             | -                        |
|   | 30(CNP-Ni)  | -                                  | 1                                  | 9                       | -                           | 50                             | -                        |
| G | 30          | 1                                  | -                                  | 9                       | -                           | -                              | 50                       |
|   | 30(CNP-Ni)  | -                                  | 1                                  | 9                       | -                           | -                              | 50                       |
| H | 30(P + CN)  | 1                                  | -                                  | 9                       | 50                          | -                              | -                        |
|   | 30(P/CN-Ni) | -                                  | 1                                  | 9                       | 50                          | -                              | -                        |

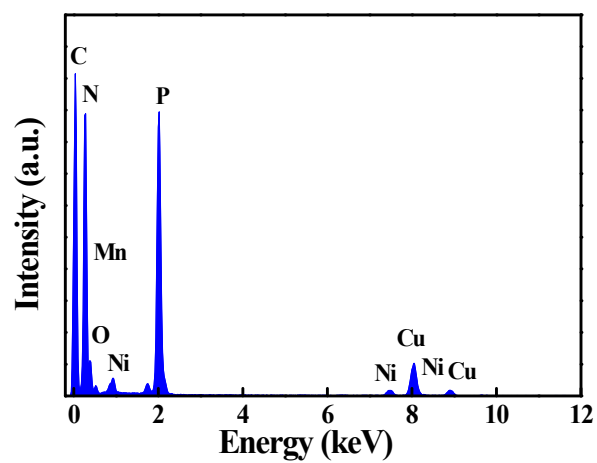

**Fig. S1.** TEM-EDX of CNP-Ni-Mn.

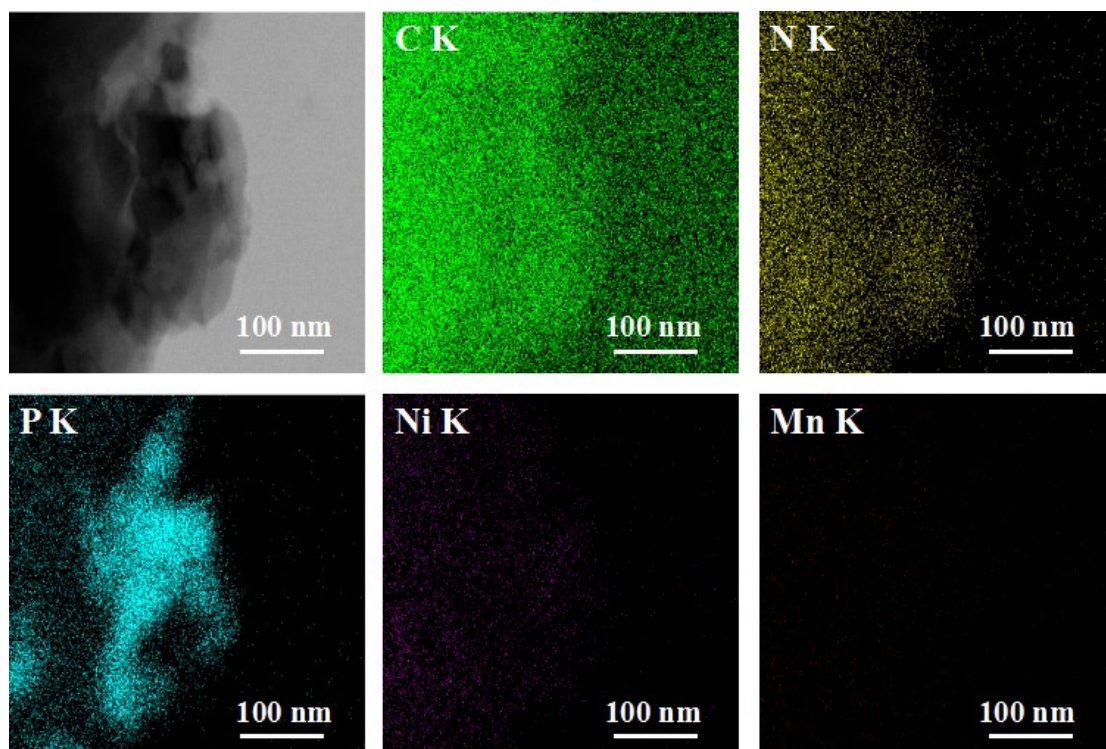

**Fig. S2.** EDX-Mapping images of C, N, P, Ni and Mn elements in CNP-Ni-Mn.

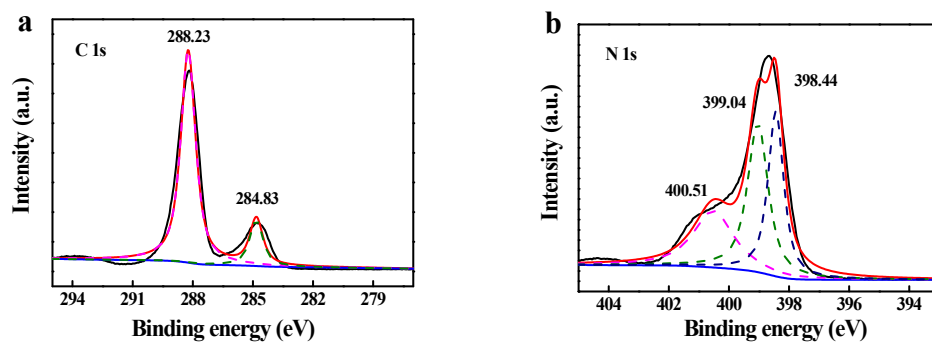

**Fig. S3.** The high-resolution XPS spectra of C 1s (a) and N 1s (b) in pure g-C<sub>3</sub>N<sub>4</sub>.

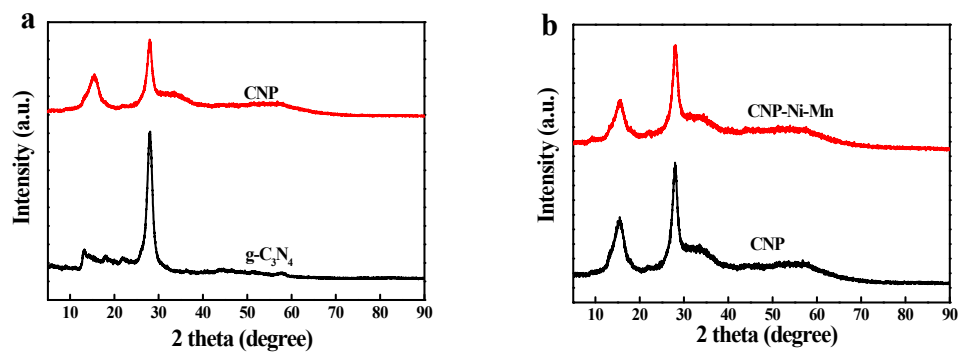

**Fig. S4.** The XRD patterns of  $g\text{-C}_3\text{N}_4$  and CNP (a), CNP and CNP-Ni-Mn (b).

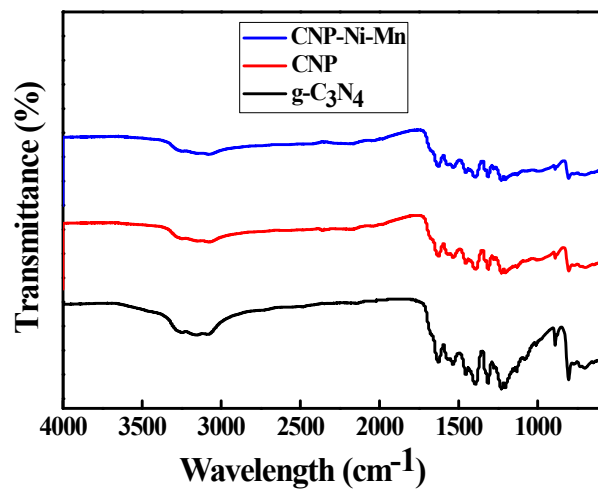

**Fig. S5.** FT-IR spectroscopy of g-C<sub>3</sub>N<sub>4</sub>, CNP and CNP-Ni-Mn.



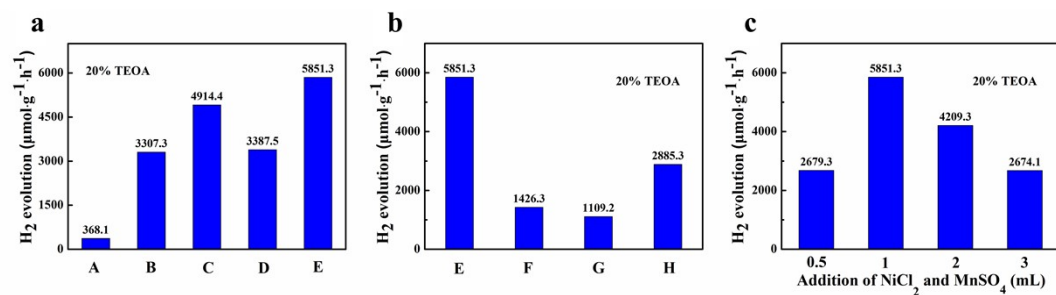

**Fig. S6.** (a) Photocatalytic hydrogen production activity of catalyst A-E in 20 vol% TEOA solution in Table 1. (b) Comparison of irradiation (E), heating (F), stirring (G) and red phosphorus (H) in 20 vol% TEOA solution. (d) Photocatalytic hydrogen production activity of different addition amount of NiCl<sub>2</sub> and MnSO<sub>4</sub> (1:1) in 20 vol% TEOA solution.

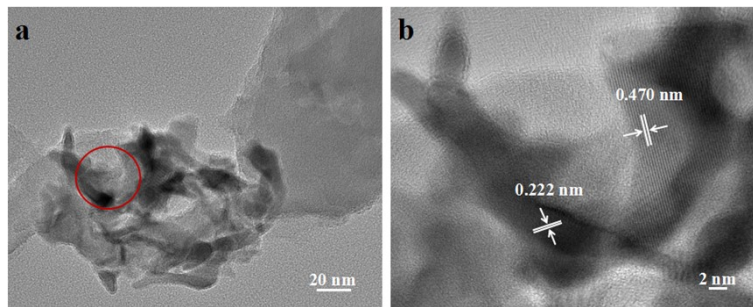

**Fig. S7.** TEM (a) and HR - TEM (b) of CNP-Ni-Mn after photocatalysis. The measured lattice fringes of 0.222 nm and 0.470 nm correspond to the (111) crystal face  $\text{Ni}_2\text{P}$  and the (200) crystal face of  $\text{Mn}_2\text{O}_3$ .

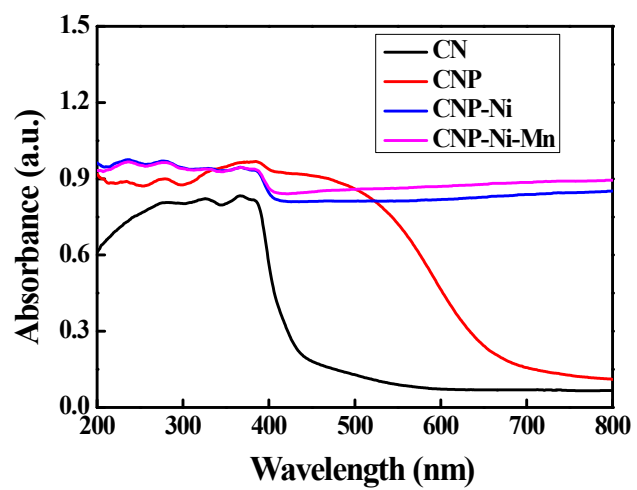

**Fig. S8.** UV-vis diffuse reflectance spectroscopy of pure g-C<sub>3</sub>N<sub>4</sub>, CNP, CNP-Ni and CNP-Ni-Mn.

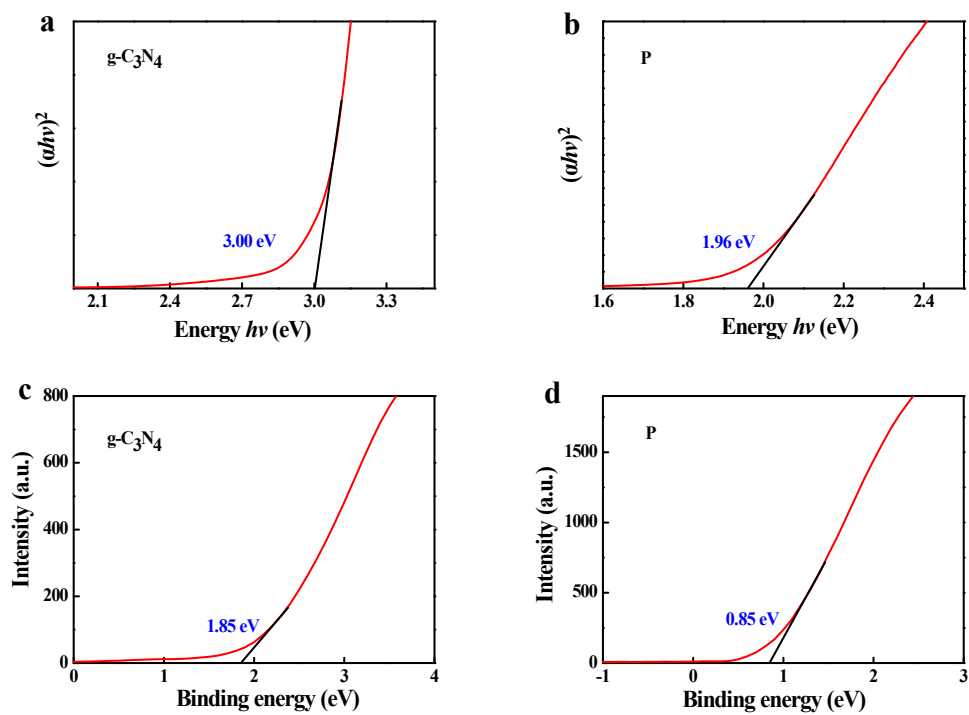

**Fig. S9.** Tauc plots of g-C<sub>3</sub>N<sub>4</sub> (a) and red P (b). XPS spectra of g-C<sub>3</sub>N<sub>4</sub> (c) and red P (d) for valence band offset determination.

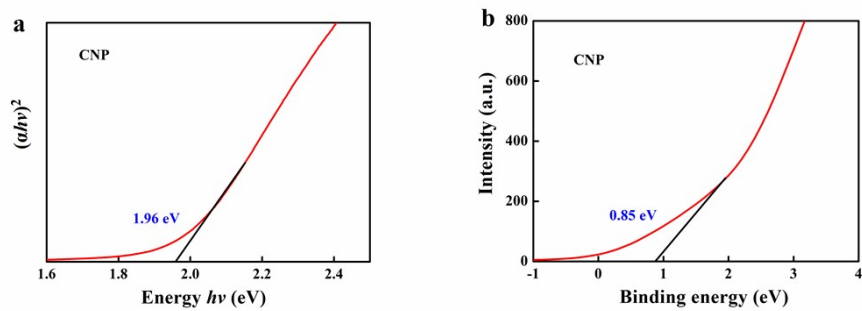

**Fig. S10.** (a) Tauc plots of CNP. (b) XPS spectra of CNP for valence band offset determination.

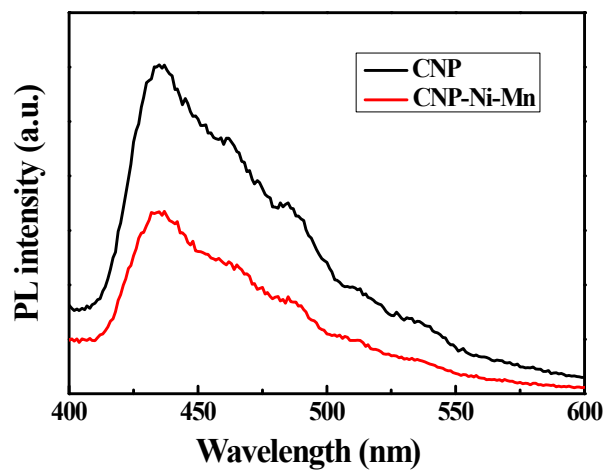

**Fig. S11.** PL spectra of CNP and CNP-Ni-Mn under the excitation wavelength of 375 nm.

**Table S2.** The co-catalysts for photocatalytic hydrogen evolution reaction.

| Photocatalyst                                       | Co-catalysts                                     | Light source                                              | Sacrificial agent                                   | Activity ( $\mu\text{mol h}^{-1} \text{g}^{-1}$ ) | Stability at least (h) | Ref. (year)         |
|-----------------------------------------------------|--------------------------------------------------|-----------------------------------------------------------|-----------------------------------------------------|---------------------------------------------------|------------------------|---------------------|
| g-C <sub>3</sub> N <sub>4</sub> /WO <sub>3</sub>    | Ni(OH) <sub>x</sub>                              | $\lambda > 400 \text{ nm}$<br>(Xe)                        | TEOA                                                | 576                                               | 12                     | <sup>1</sup> (2017) |
| g-C <sub>3</sub> N <sub>4</sub>                     | Co                                               | AM 1.5<br>(Xe)                                            | TEOA                                                | 2296                                              | 48                     | <sup>2</sup> (2018) |
| g-C <sub>3</sub> N <sub>4</sub>                     | MoS <sub>2</sub>                                 | $\lambda \geq 400 \text{ nm}$<br>(Xe)                     | Lactic acid                                         | 660                                               | 9                      | <sup>3</sup> (2018) |
| N-TiO <sub>2</sub> /g-C <sub>3</sub> N <sub>4</sub> | Ni <sub>x</sub> P                                | $780 > \lambda > 350 \text{ nm}$<br>(Xe)                  | TEOA                                                | 5438                                              | 10                     | <sup>4</sup> (2018) |
| TiO <sub>2</sub>                                    | CuO <sub>x</sub>                                 | AM 1.5G<br>(Xe)                                           | Methanol                                            | 407                                               | —                      | <sup>5</sup> (2018) |
| CaIn <sub>2</sub> S <sub>4</sub>                    | MnO <sub>x</sub>                                 | $750 \text{ nm} \geq \lambda \geq 420 \text{ nm}$<br>(Xe) | Na <sub>2</sub> S + Na <sub>2</sub> SO <sub>3</sub> | 5520                                              | —                      | <sup>6</sup> (2019) |
| g-C <sub>3</sub> N <sub>4</sub>                     | NiS, CoS <sub>x</sub> ,<br>CuS <sub>x</sub>      | 420 nm<br>(LED)                                           | TEOA                                                | 244                                               | 7.5                    | <sup>7</sup> (2021) |
| g-C <sub>3</sub> N <sub>4</sub>                     | Ni-Ag                                            | $\lambda \geq 420 \text{ nm}$<br>(Xe)                     | Methanol                                            | 2137.5                                            | 16                     | <sup>8</sup> (2022) |
| g-C <sub>3</sub> N <sub>4</sub> /red P              | Ni <sub>x</sub> P-Mn <sub>3</sub> O <sub>4</sub> | AM 1.5<br>(Xe)                                            | TEOA                                                | 5851.3                                            | 8                      | This work           |

1. K. He, J. Xie, X. Luo, J. Wen, S. Ma, X. Li, Y. Fang and X. Zhang, *Chinese J. Catal.*, 2017, **38**, 240-252.
2. W. Chen, Y. Wang, M. Liu, L. Gao, L. Mao, Z. Fan and W. Shangguan, *Appl. Surf. Sci.*, 2018, **444**, 485-490.
3. X. Shi, M. Fujitsuka, S. Kim and T. Majima, *Small*, 2018, **14**, e1703277.
4. M. Wu, J. Zhang, C. Liu, Y. Gong, R. Wang, B. He and H. Wang, *ChemCatChem*, 2018, **10**, 3069-3077.
5. P. A. Bharad, A. V. Nikam, F. Thomas and C. S. Gopinath, *ChemistrySelect*, 2018, **3**, 12022-12030.
6. J. Ding, X. Li, L. Chen, X. Zhang, H. Yin and X. Tian, *ACS Appl. Mater. Interfaces*, 2019, **11**, 835-845.
7. M. Wang, J. Cheng, X. Wang, X. Hong, J. Fan and H. Yu, *Chinese J. Catal.*, 2021, **42**, 37-45.
8. F. Sarwar, M. Tahir and H. Alias, *Mater. Sci. Semicond. Process.*, 2022, **137**.
